# Supplementary figures and images for: GMCL1 controls 53BP1 stability and modulates taxane sensitivity
Source: eLife journal article supplement (doi:10.7554/elife.106730), 2025-05-23

Figure1C

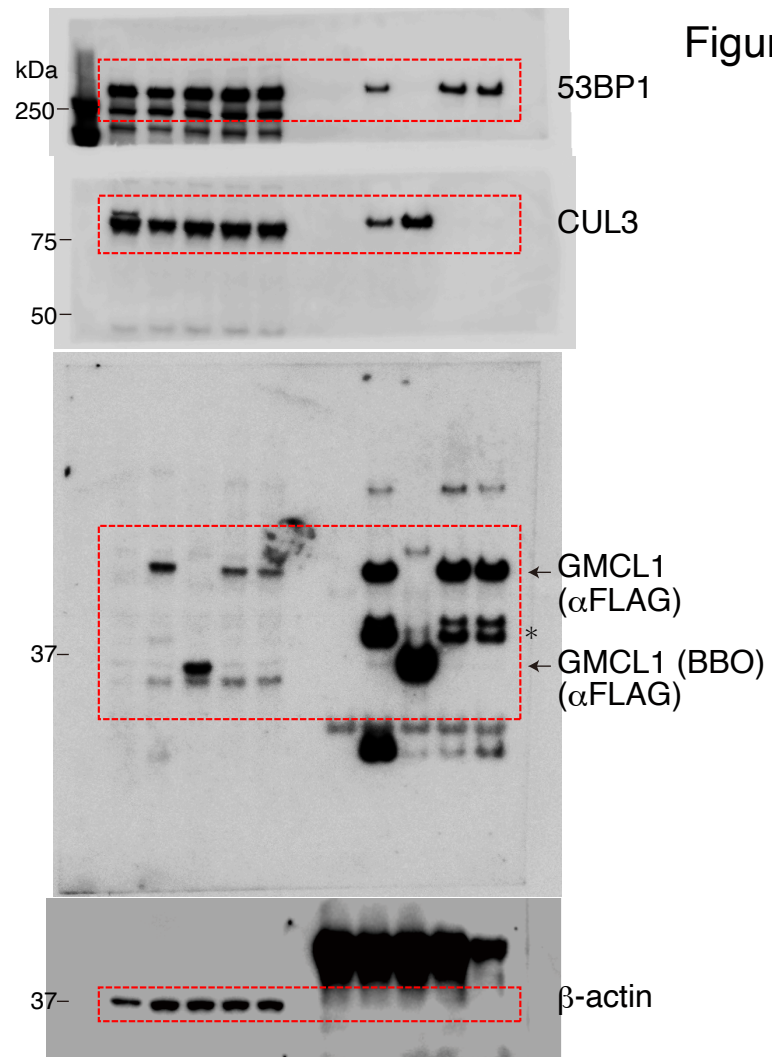

Figure1D

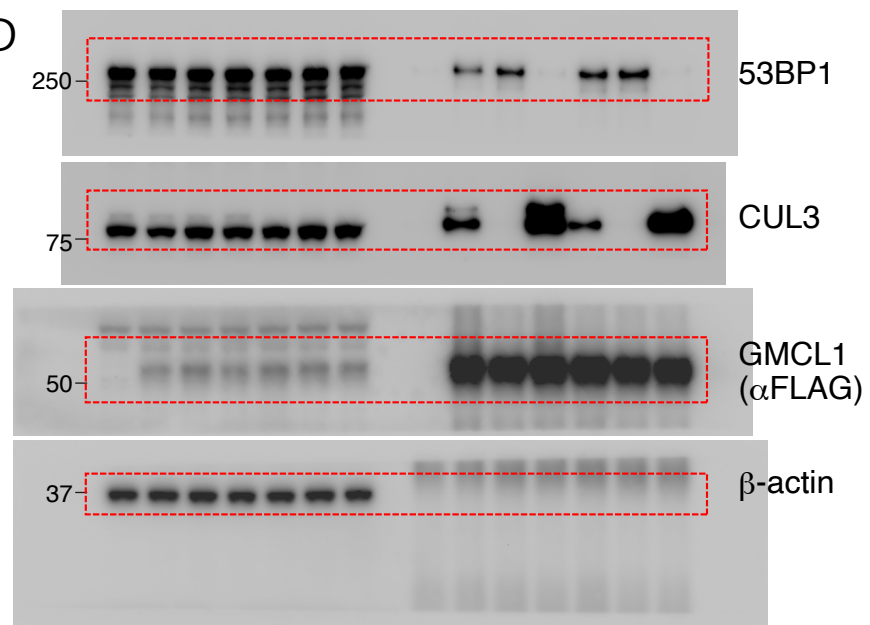

Supplement: fig1-data2 [file Figure1-1_Raw uncropped supporting Western blot files.pdf › Figure 1—source data 2/Figure1-1_Raw uncropped supporting Western blot files.pdf]

Figure1E

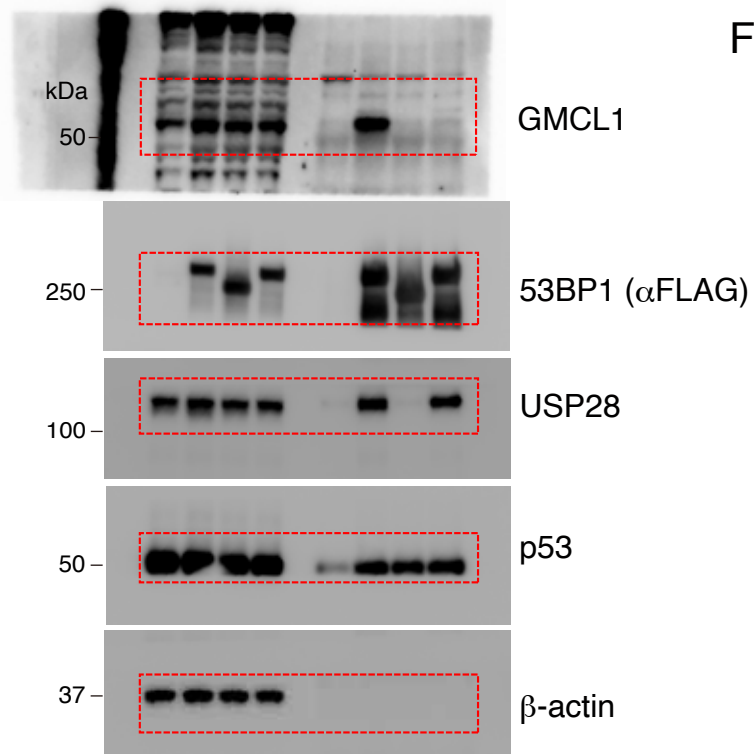

Figure1F

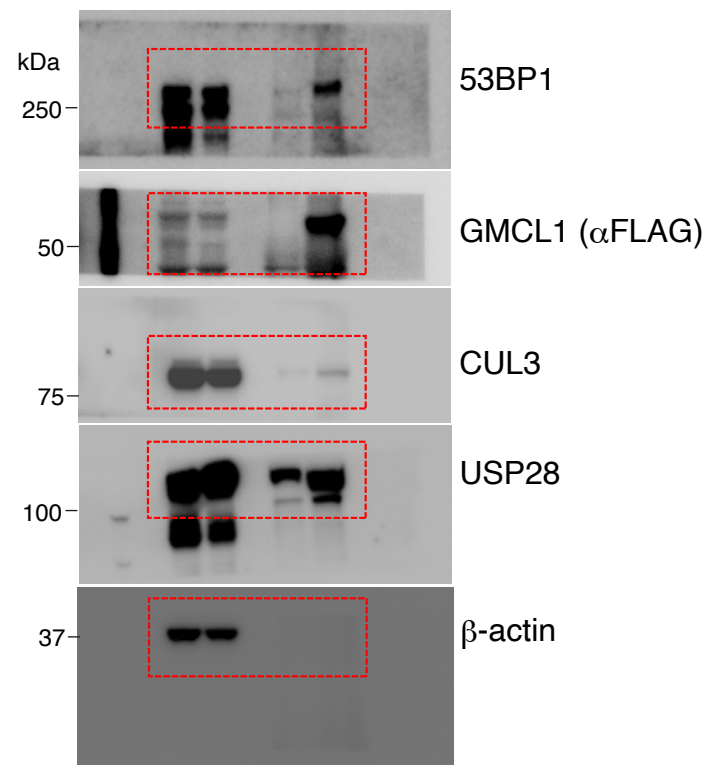

Supplement: fig1-data2 [file Figure1-2_Raw uncropped supporting Western blot files.pdf › Figure 1—source data 2/Figure1-2_Raw uncropped supporting Western blot files.pdf]

Supplemental  
Figure1C

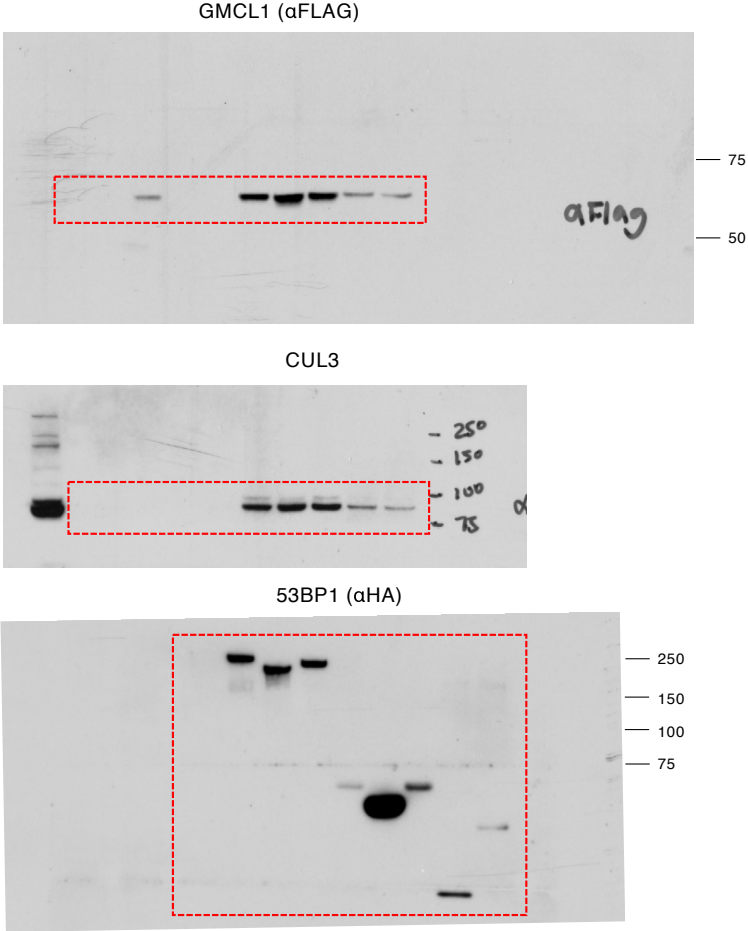

Supplemental  
Figure1D

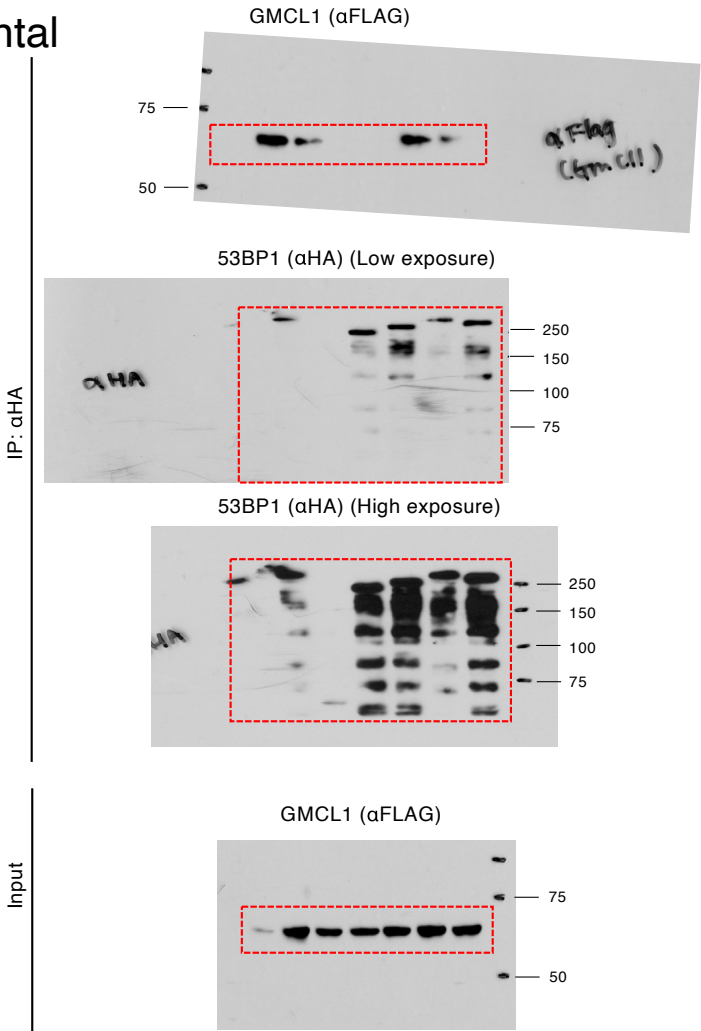

Supplement: fig1-figsupp1-data2 [file SupFigure1-1_Raw uncropped supporting Western blot files.pdf › Figure 1—figure supplement 1—source data 2/SupFigure1-1_Raw uncropped supporting Western blot files.pdf]

Supplemental  
Figure1E

CUL3

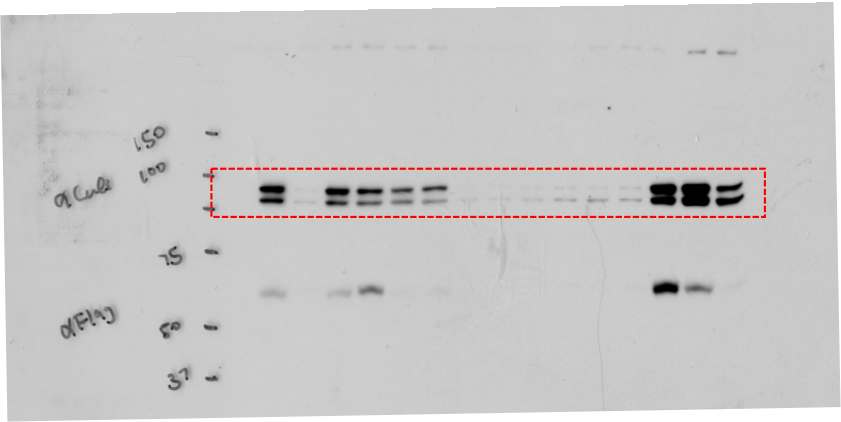

GMCL1 (αFLAG)

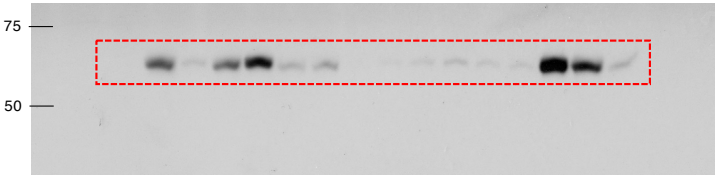

53BP1 MFF (αHA)

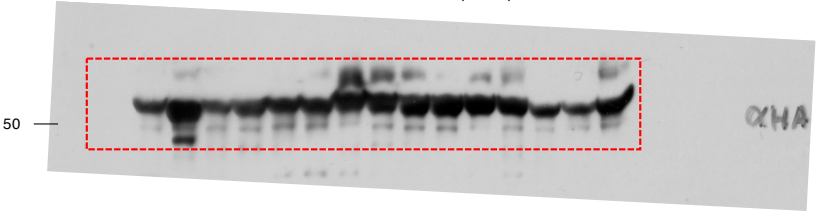

53BP1

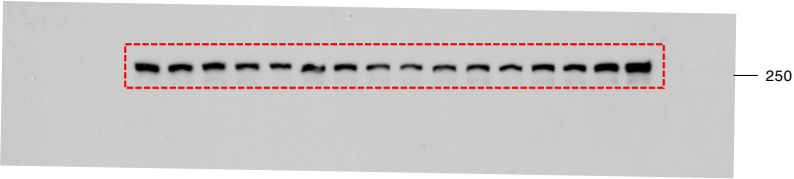

CUL3

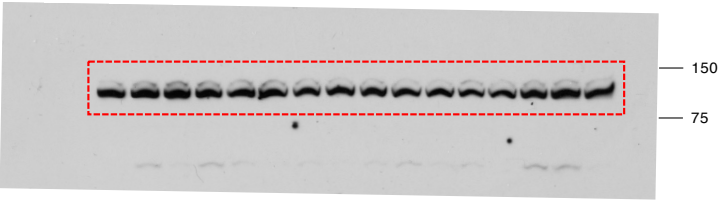

GMCL1 (αFLAG)

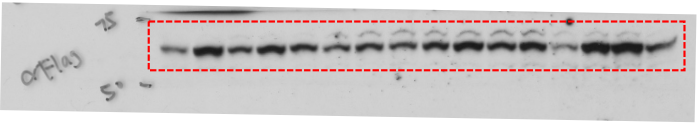

Supplement: fig1-figsupp1-data2 [file SupFigure1-2_Raw uncropped supporting Western blot files.pdf › Figure 1—figure supplement 1—source data 2/SupFigure1-2_Raw uncropped supporting Western blot files.pdf]

Supplemental  
Figure1F

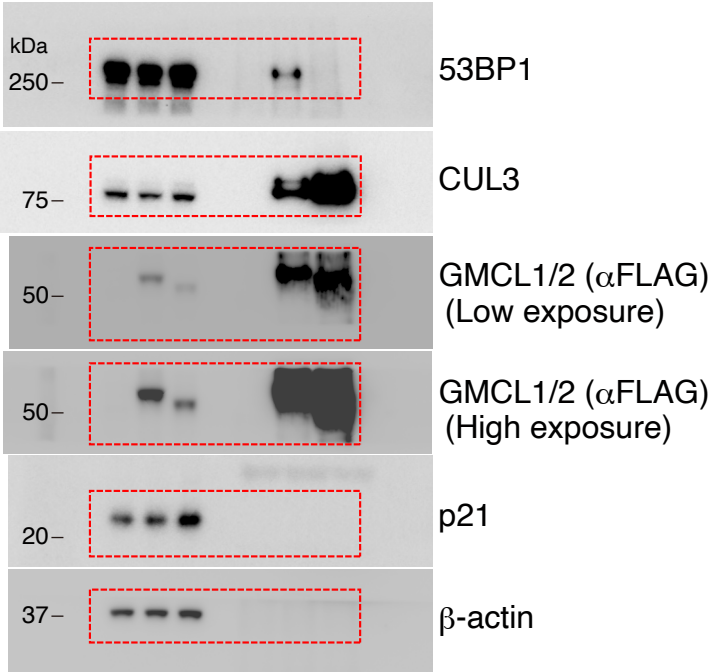

Supplement: fig1-figsupp1-data2 [file SupFigure1-3_Raw uncropped supporting Western blot files.pdf › Figure 1—figure supplement 1—source data 2/SupFigure1-3_Raw uncropped supporting Western blot files.pdf]

Figure2A

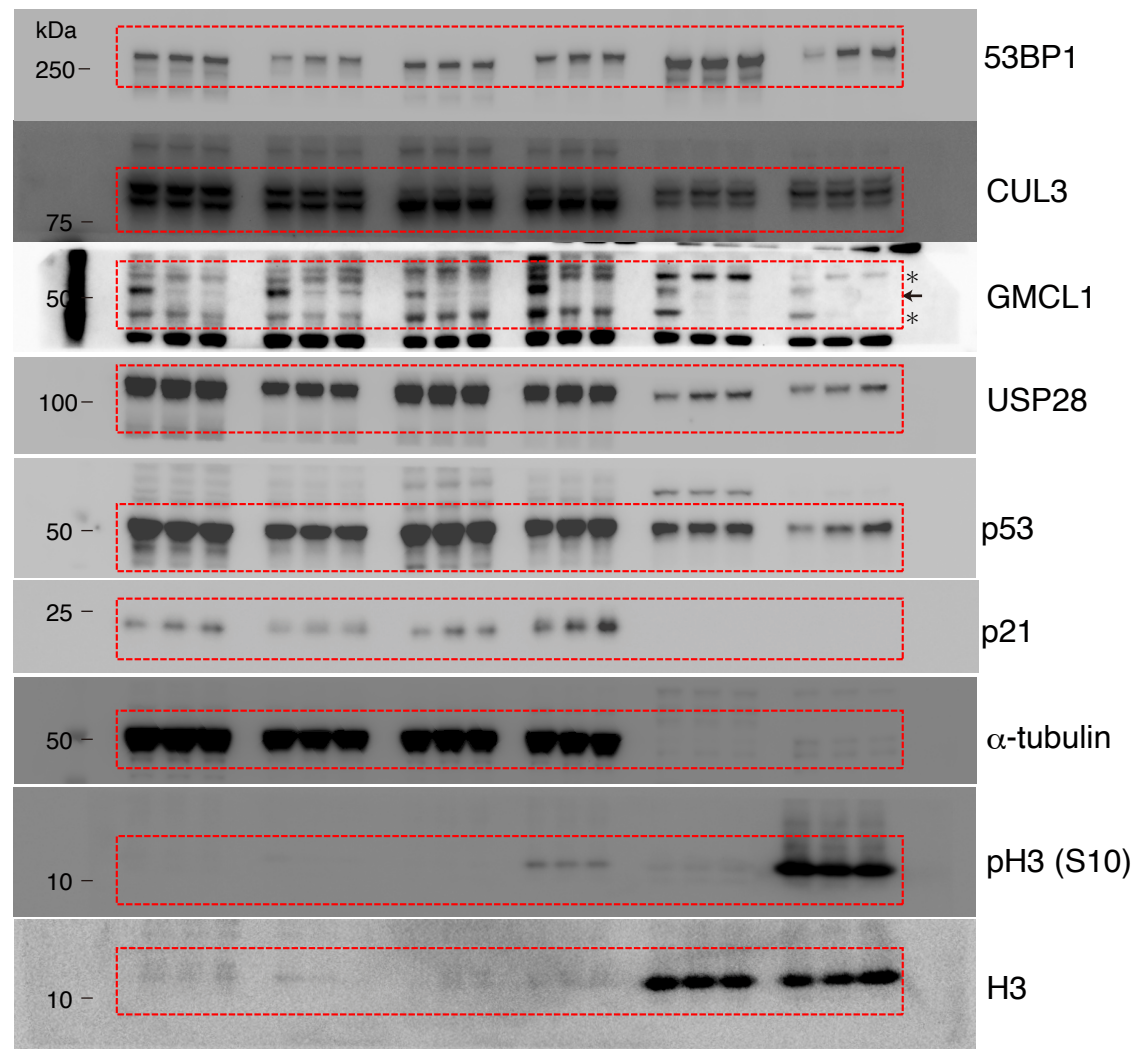

Supplement: fig2-data2 [file Figure2-1_Raw uncropped supporting Western blot files.pdf › Figure 2—source data 2/Figure2-1_Raw uncropped supporting Western blot files.pdf]

Figure2B and Supplemental Figure2A

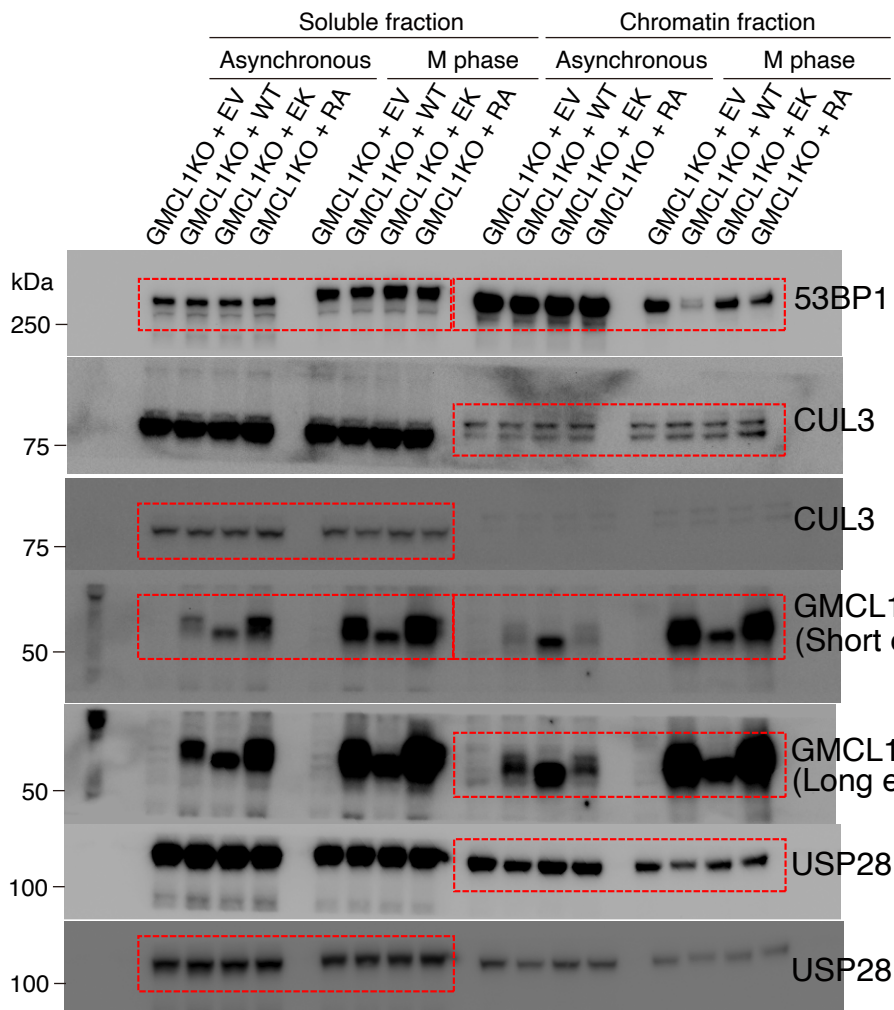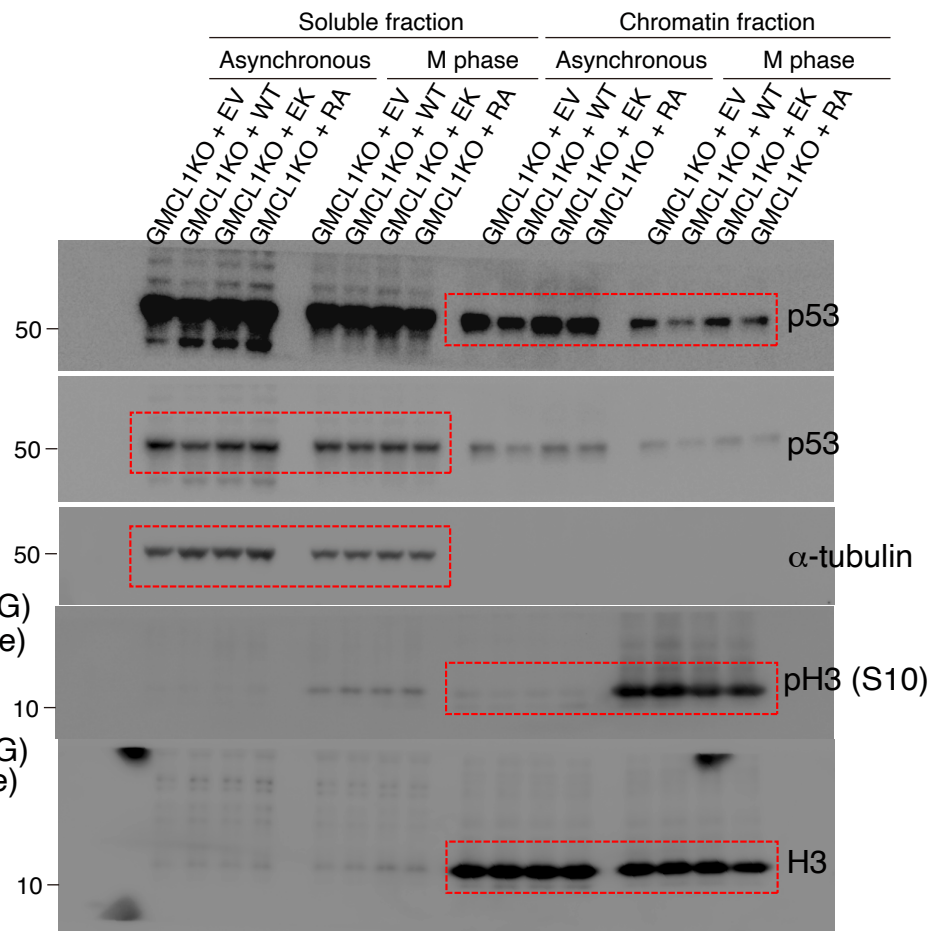

Supplement: fig2-data2 [file Figure2-2_Raw uncropped supporting Western blot files.pdf › Figure 2—source data 2/Figure2-2_Raw uncropped supporting Western blot files.pdf]

Figure2C

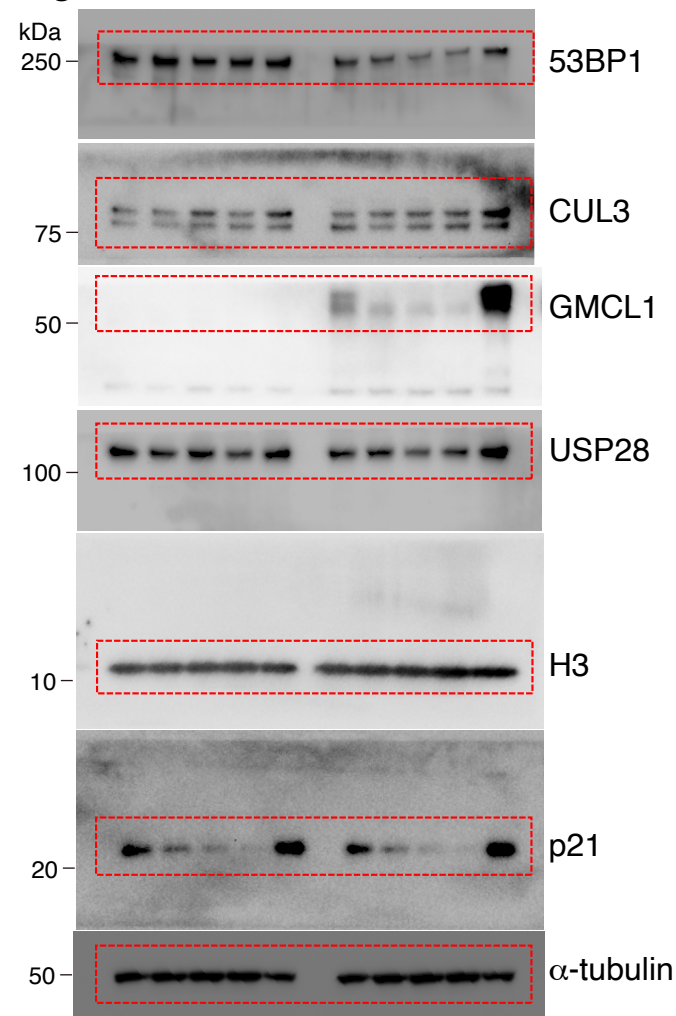

Figure2D

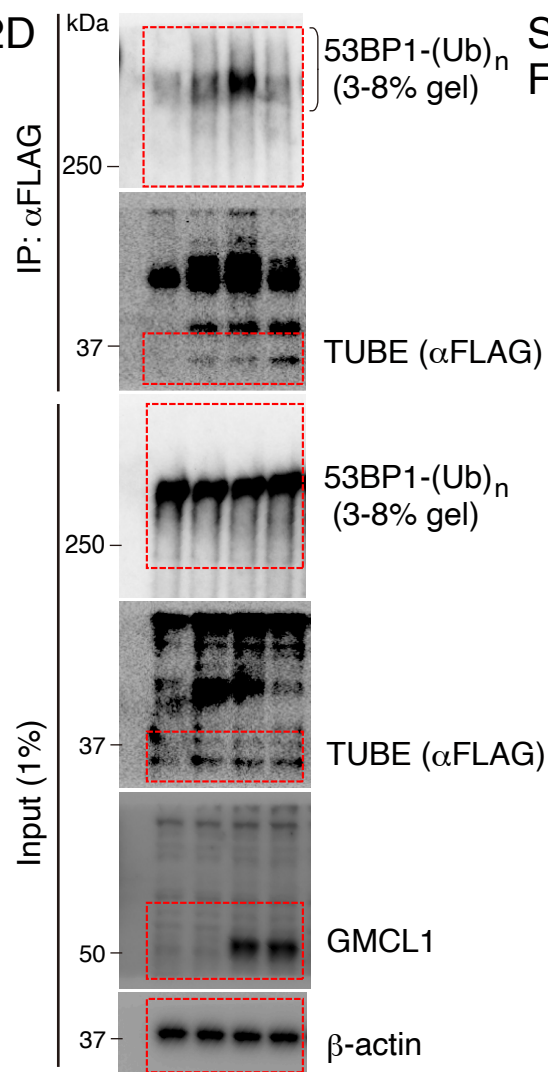

Supplemental Figure2B

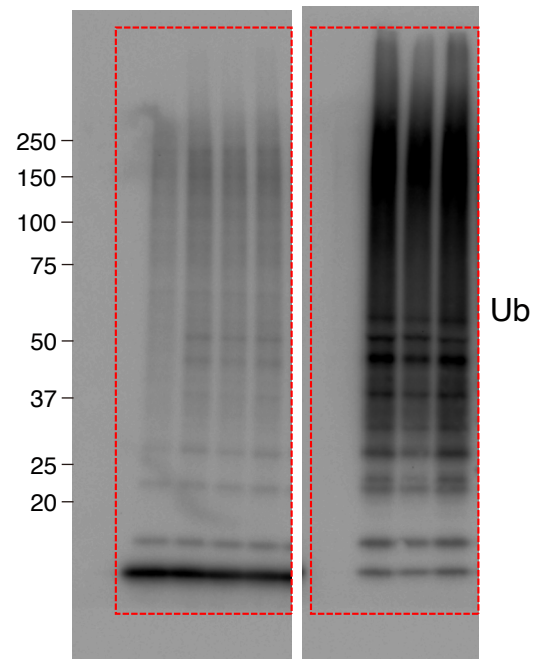

Supplement: fig2-data2 [file Figure2-3_Raw uncropped supporting Western blot files.pdf › Figure 2—source data 2/Figure2-3_Raw uncropped supporting Western blot files.pdf]

Figure2C (53BP1)

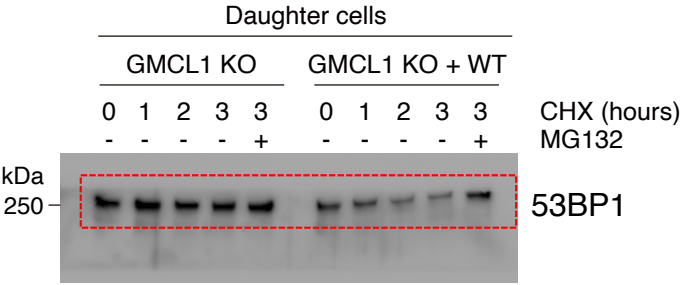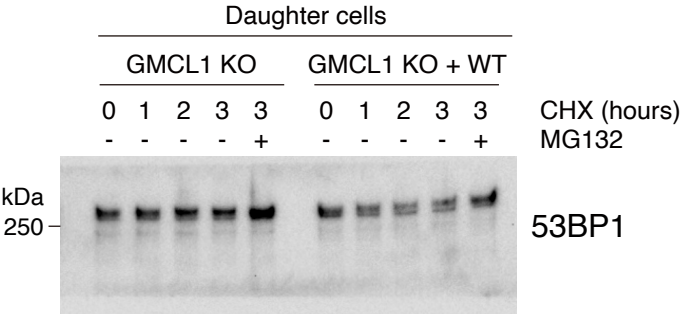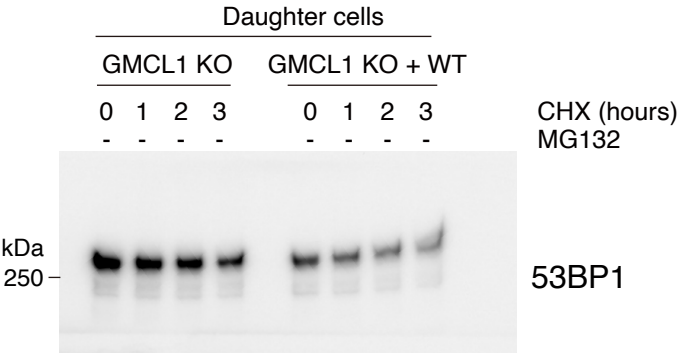

Chromatin fraction

Supplement: fig2-data2 [file Figure2C(53BP1)_Raw uncropped supporting Western blot files.pdf › Figure 2—source data 2/Figure2C(53BP1)_Raw uncropped supporting Western blot files.pdf]

# Supplemental Figure2C

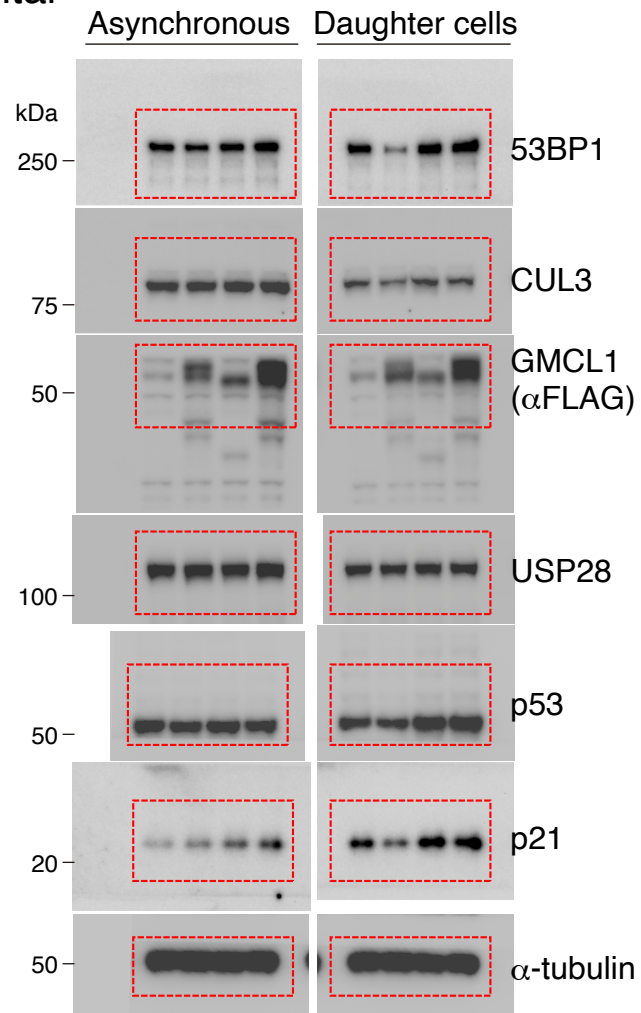

Supplement: fig2-figsupp1-data2 [file SupFigure2-1_Raw uncropped supporting Western blot files.pdf › Figure 2—figure supplement 1—source data 2/SupFigure2-1_Raw uncropped supporting Western blot files.pdf]

Figure3B

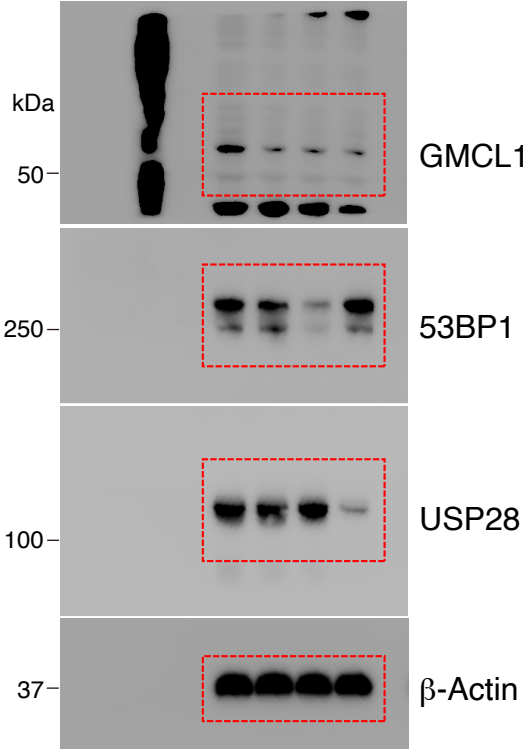

Figure3D

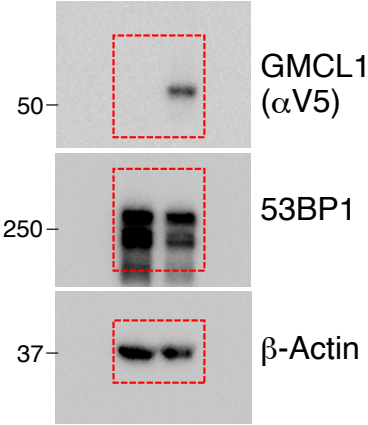

Supplement: fig3-data2 [file Figure3-1_Raw uncropped supporting Western blot files.pdf › Figure 3—source data 2/Figure3-1_Raw uncropped supporting Western blot files.pdf]
